# Supplementary material for: Fluid Proteomics of CSF and Serum Reveal Important Neuroinflammatory Proteins in Blood-Brain Barrier Disruption and Outcome Prediction following Severe Traumatic Brain Injury: a Prospective, Observational Study
Source: Research Square preprint supplement (doi:10.21203/rs.3.rs-96625/v2), 2021-01-27
Supplement: Supplementary file 2 [file 78e44b93aba59917227e6419.docx]

Supplementary Material

Supplementary Material is provided separately and contains:

1. Supplementary Methods, Supplementary Results, Supplementary Figure Legends
2. Supplementary Figures S1-S8
3. Supplementary Tables S1-S6.
4. STROBE statement.
